# Supplementary material
Source: PubMed Central journal article supplement (PMC6648597)
Supplement: ao9b00230_si_001.pdf [file ao9b00230_si_001.pdf]

## SUPPLEMENTARY INFORMATION

### **Carbon Quantum Dots Modified Carbon Paste Electrode Based Sensor for Selective and Sensitive Determination of Adrenaline**

S. Sharath Shankar<sup>ab\*</sup>, Rayamarakkar M. Shereema<sup>a</sup>, Vishnu Ramachandran<sup>b</sup>, Sruthi T.V<sup>b</sup>, V.B. Sameer Kumar<sup>b</sup>, and R.B.Rakhi<sup>a\*</sup>.

*<sup>a</sup>Chemical Sciences & Technology Division (CSTD), CSIR-National Institute for Interdisciplinary Science & Technology (CSIR-NIIST), Trivandrum 695019, INDIA.*

*<sup>b</sup>Department of Biochemistry & Molecular Biology, Central University of Kerala, Periyar 671316, INDIA.*

*\*e-mail: [sharathshankar82@gmail.com](mailto:sharathshankar82@gmail.com), [rakhiraghavanbaby@niist.res.in](mailto:rakhiraghavanbaby@niist.res.in)*

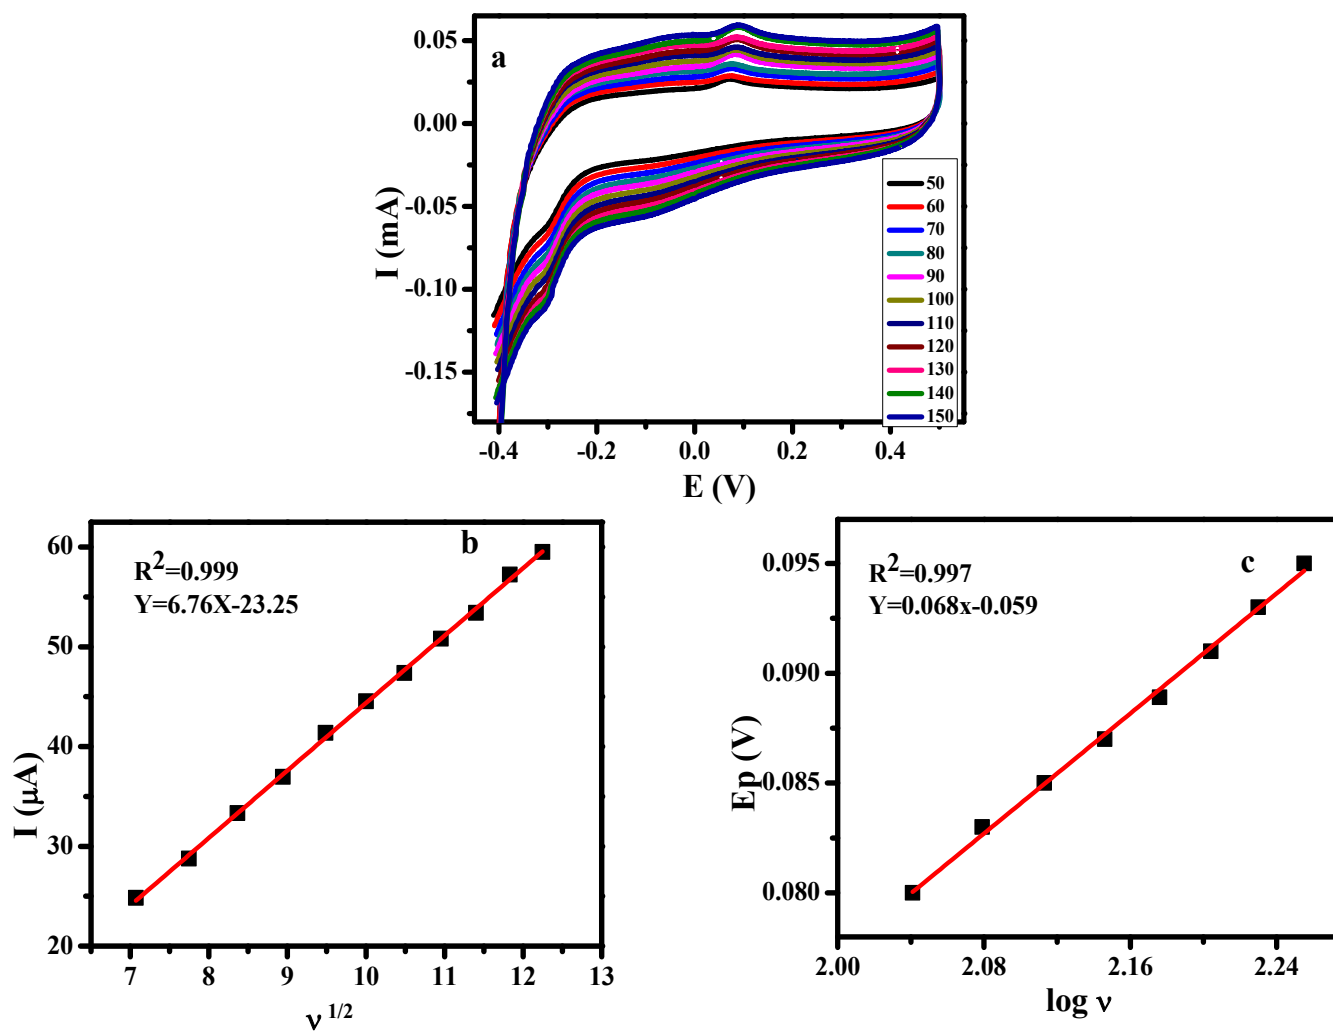

**Figure S1(a):** Cyclic voltammograms of oxidation of 1  $\mu\text{M}$  adrenaline in PBS of pH 7.4 at various scan rates (50 to 150 mV/s) on CQDs/CPE **(b)** Plot of  $I_p$  vs  $v^{1/2}$  **(c)** Plot of  $E_p$  vs  $\log v$ .

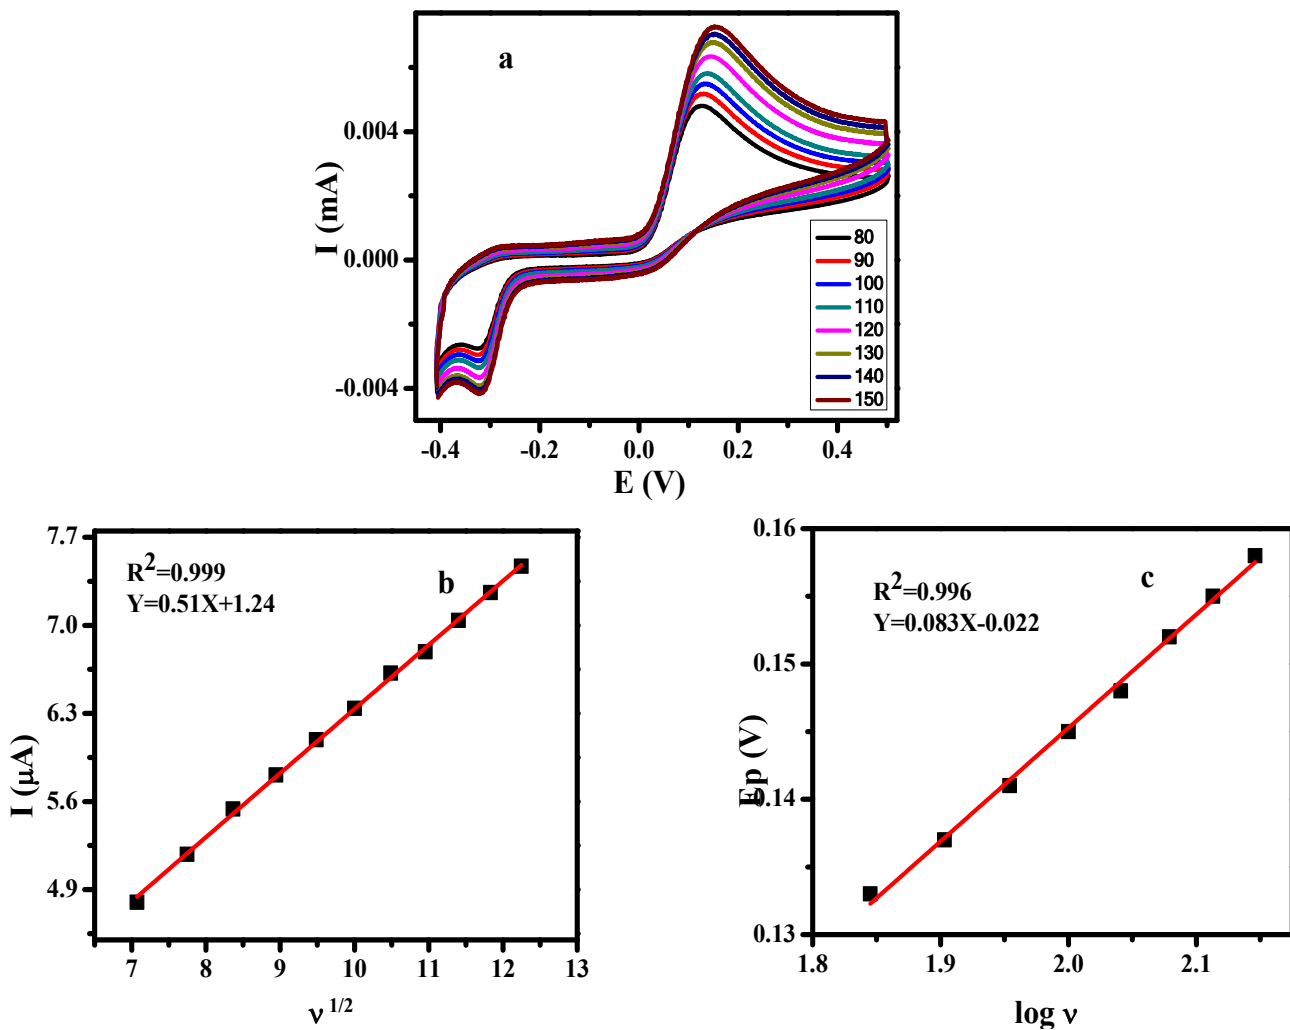

**Figure S2 (a):** Cyclic voltammograms of oxidation of 1  $\mu\text{M}$  adrenaline in PBS of pH 7.4 at various scan rates (80 to 150 mV/s) at BCPE **(b)** Plot of  $I_p$  vs  $v^{1/2}$  **(c)** Plot of  $E_p$  vs  $\log v$ .

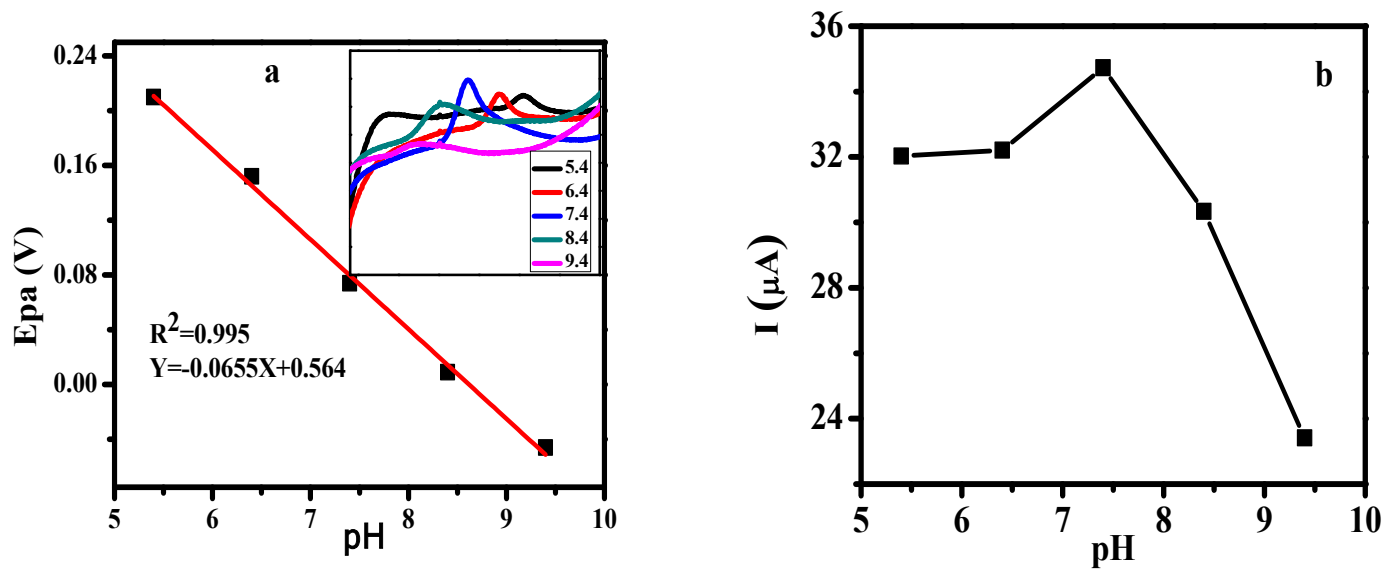

**Figure S3 (a):** Plot of  $E_{pa}$  vs pH (**inset**) Oxidation peak of 1  $\mu$ M AD in PBS of different pH with scan rate of 50 mV/s (**b**) Plot of  $I_{pa}$  vs pH.

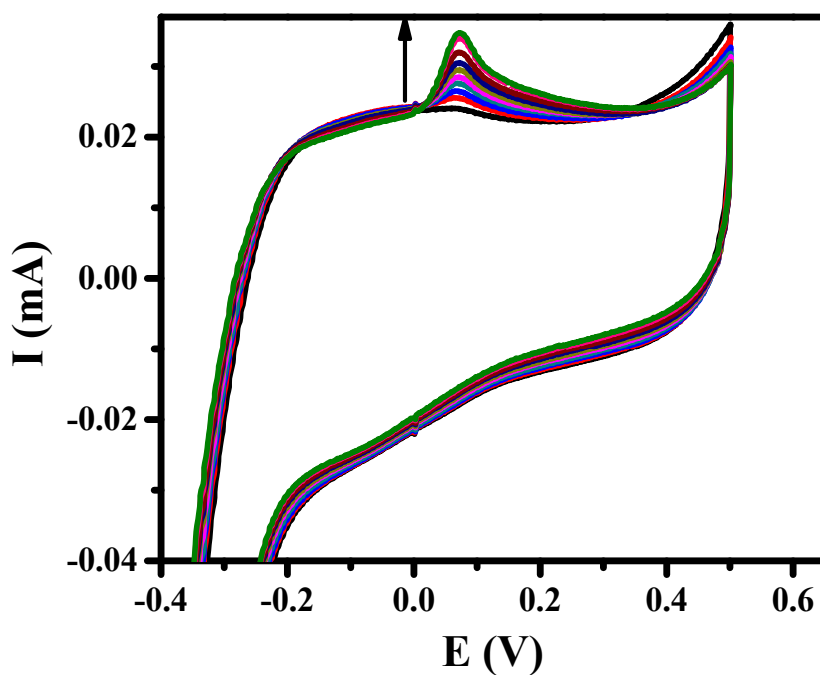

**Figure S4:** Cyclic voltammograms of AD with different concentrations (0.1 to 8  $\mu$ M) on CQDs/CPE in pH 7.4 PBS.

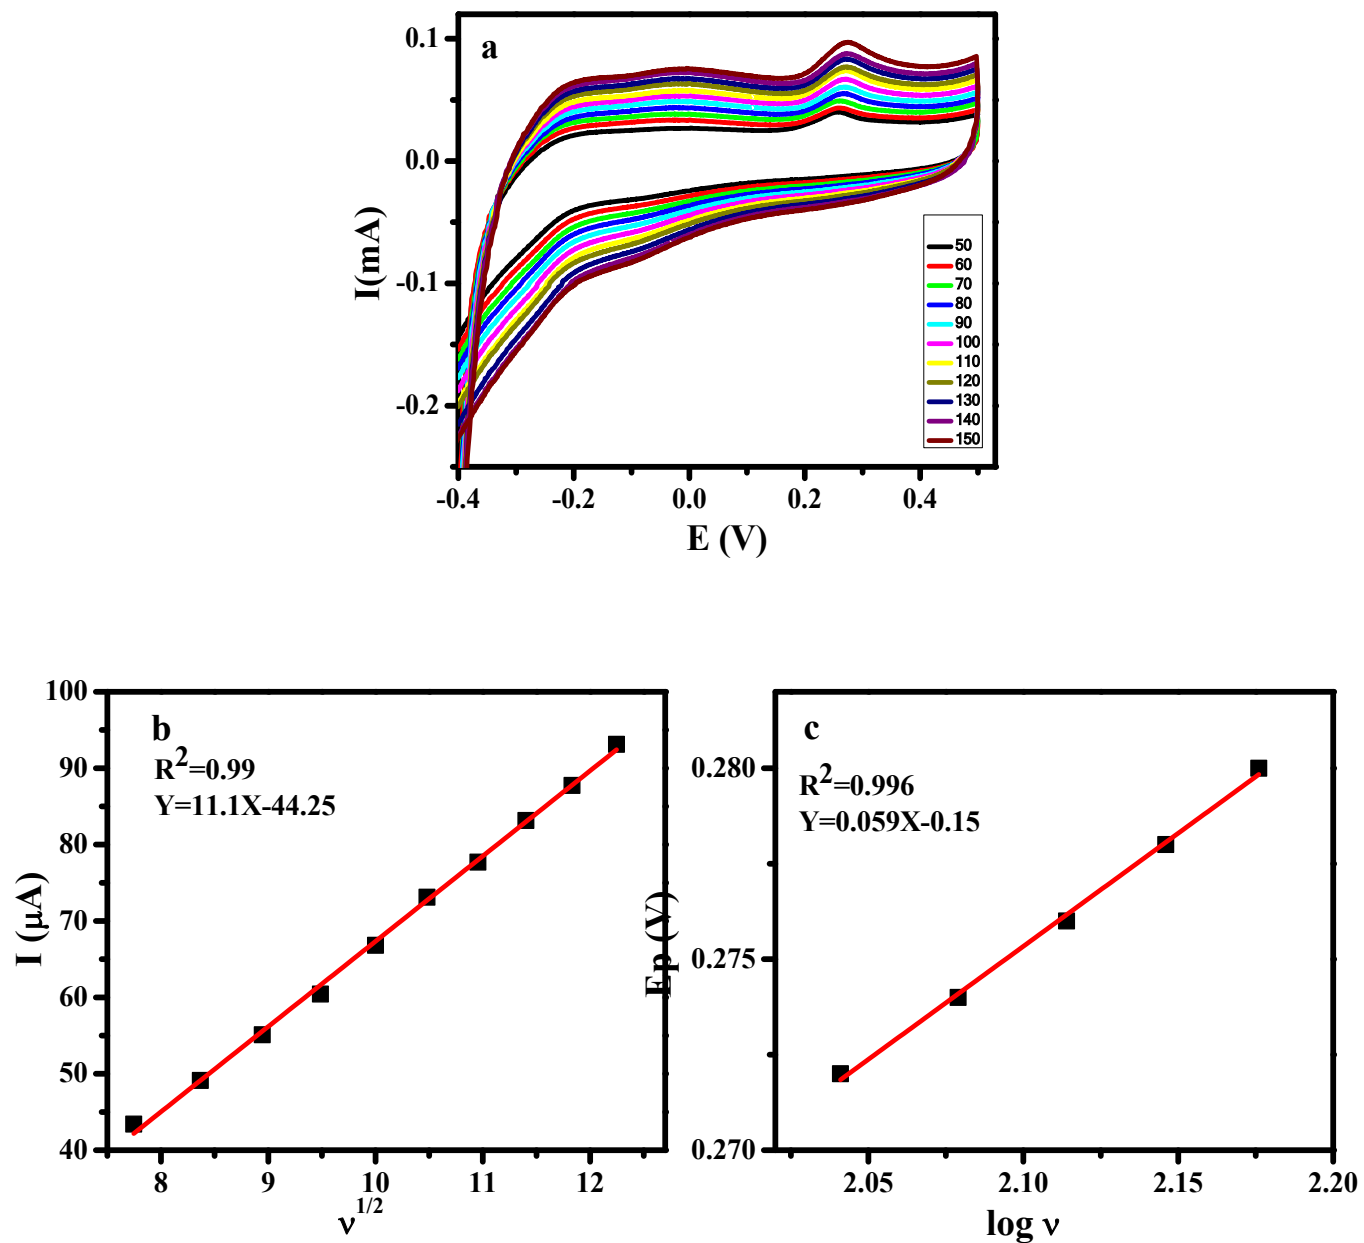

Figure S5 (a): Cyclic voltammograms of oxidation of 1  $\mu\text{M}$  serotonin in PBS of pH 7.4 with various scan rates (50 to 150 mV/s) on CQDs/CPE (b) Plot of  $I_p$  vs  $v^{1/2}$  (c) Plot of  $E_p$  vs  $\log v$ .

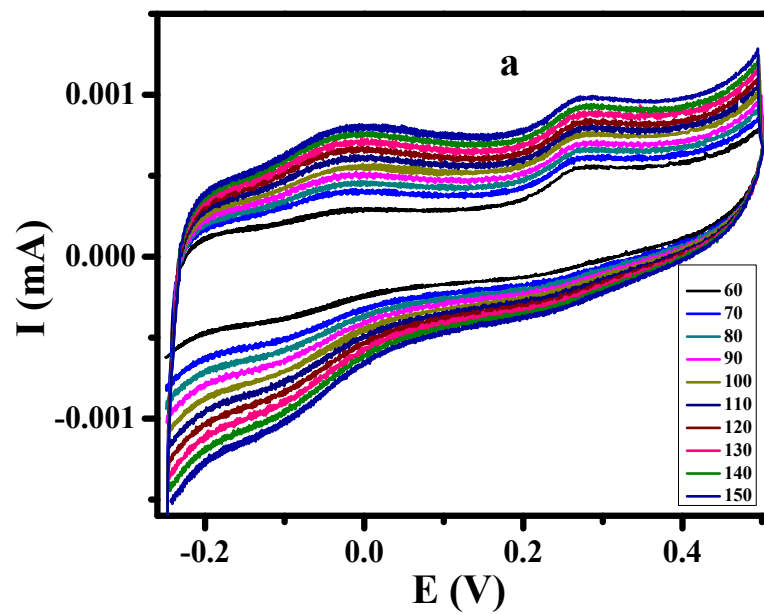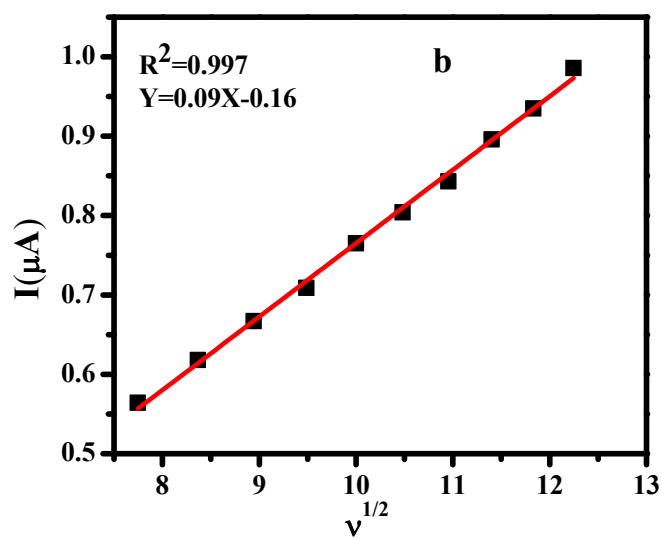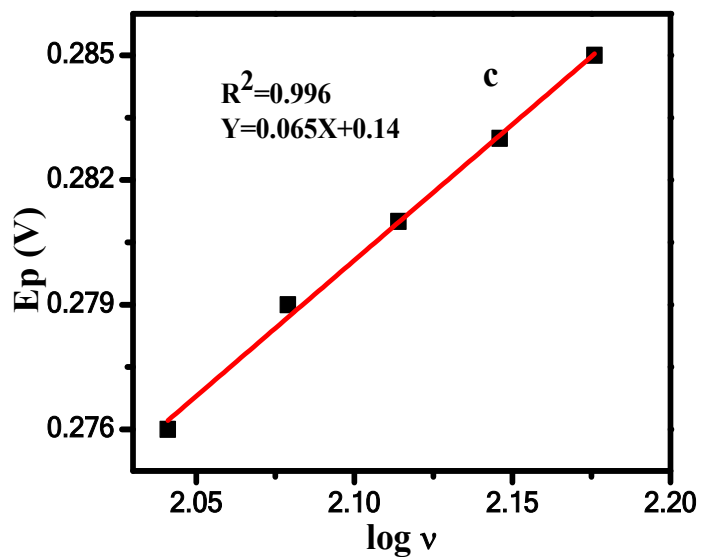

**Figure S6 (a):** Cyclic voltammograms of oxidation of adrenaline ( $10^{-6}$  M) at various scan rates (60 to 150 mV/s) at CPE **(b)** Plot of  $I_p$  vs  $v^{1/2}$  **(c)** Plot of  $E_p$  vs  $\log v$ .

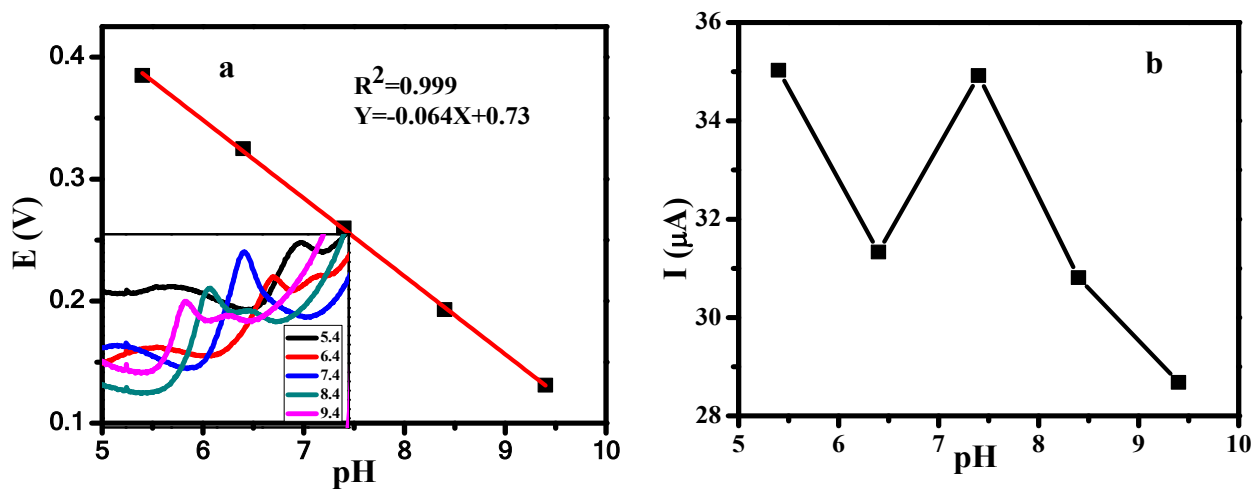

**Figure S7 (a):** Plot of  $E_p$  vs pH (inset) Electrochemical oxidation peaks of 10  $\mu\text{M}$  5-HT in PBS of pH varies from 5.4-9.4 (b) Plot of  $I_{pa}$  vs pH.

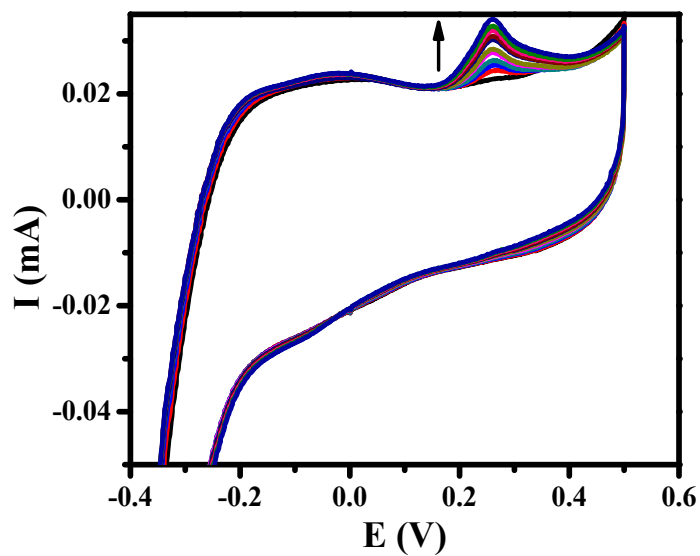

**Figure S8:** Cyclic voltammograms of 5-HT of different concentrations (1 to 100  $\mu\text{M}$ ) in pH 7.4 PBS on CQDs/CPE with a scan rate of 50 mV/s.

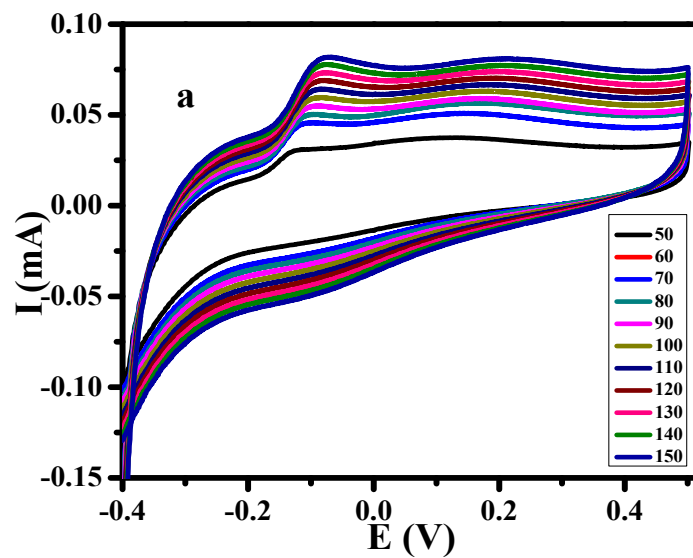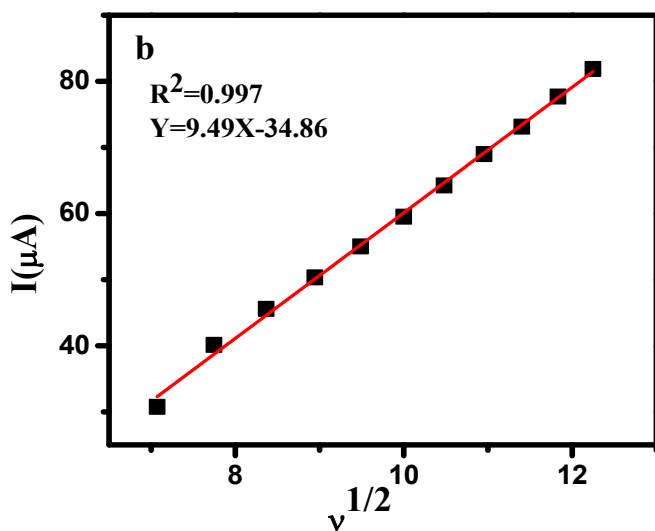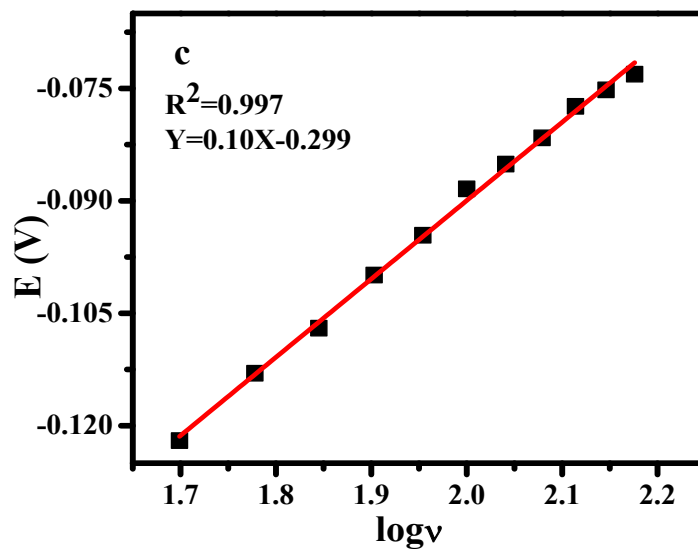

**Figure S9 (a):** Cyclic voltammograms of oxidation of ascorbic acid ( $10^{-6}$  M) at various scan rates (50 to 150 mV/s) at CQDs/CPE **(b)** Plot of  $I_p$  vs  $v^{1/2}$  **(c)** Plot of  $E_p$  vs  $\log v$ .



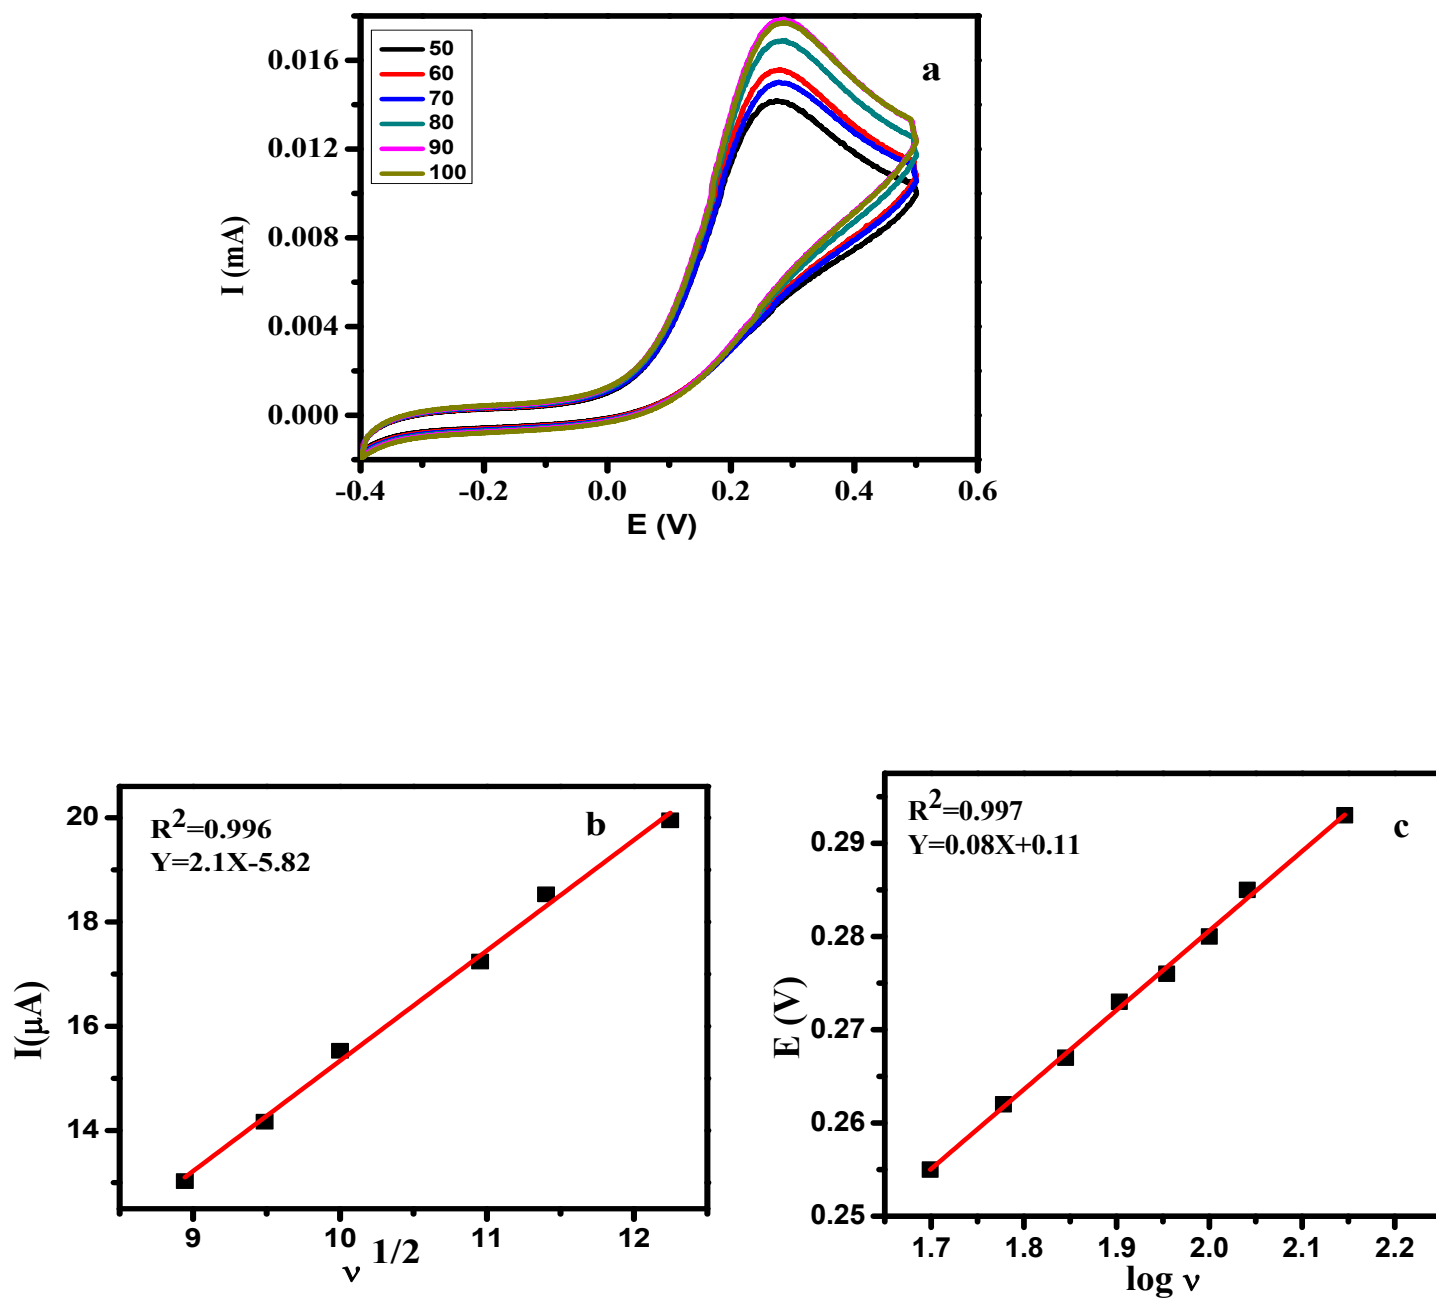

**Figure S10 (a):** Cyclic voltammograms of oxidation of ascorbic acid ( $10^{-6}$  M) at various scan rates (50 to 100 mV/s) at BCPE **(b)** Plot of  $I_p$  vs  $v^{1/2}$  **(c)** Plot of  $E_p$  vs  $\log v$ .

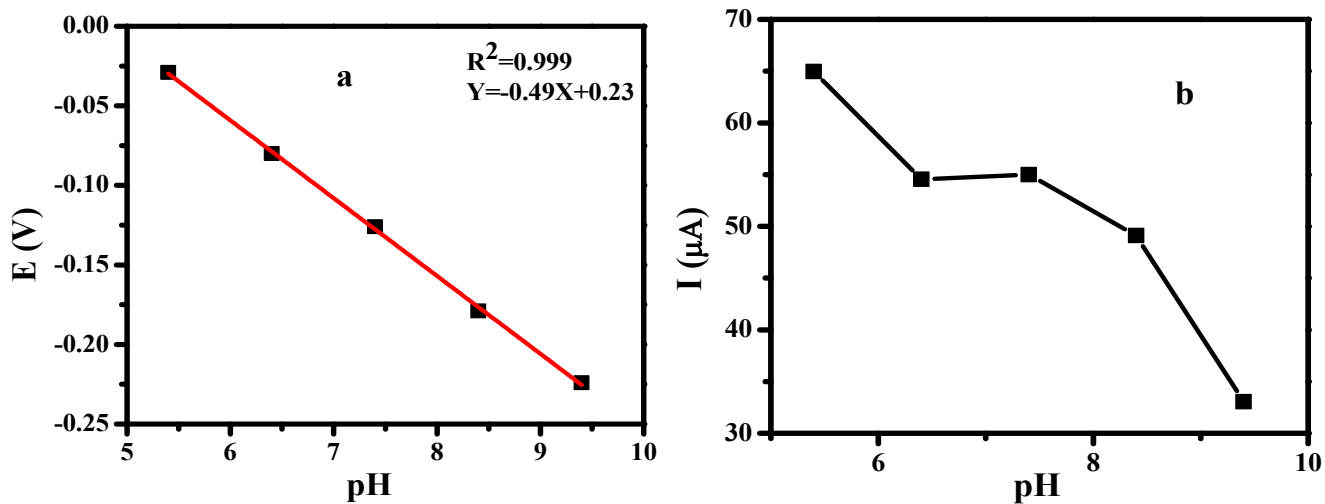

**Figure S11 (a):** Plot of  $E_p$  vs pH **(b)** Plot of  $I_{pa}$  vs pH

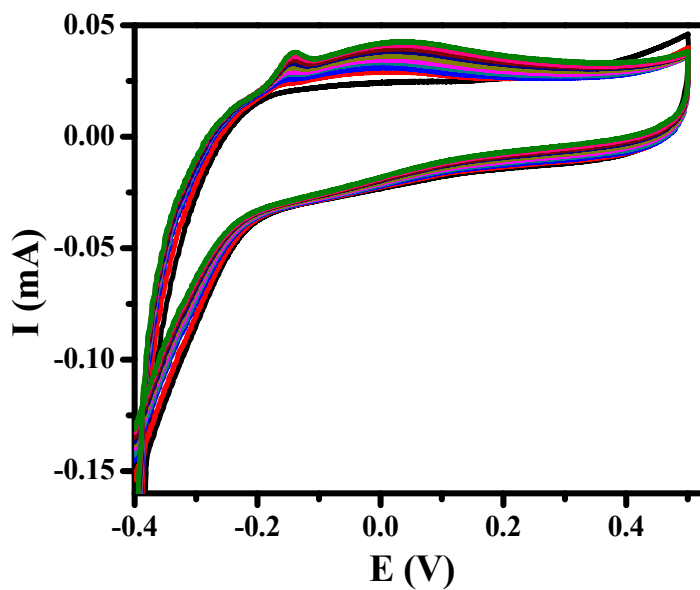

**Figure S12:** Cyclic voltammograms of different concentrations of AA (5 to 100  $\mu M$ ) on CQDs/CPE in pH 7.4 PBS.
